# Supplementary material for: A Comparative Study for Assessing the Drought-Tolerance of Chickpea Under Varying Natural Growth Environments
Source: PubMed Central journal article supplement (PMC7928316; doi:10.3389/fpls.2020.607869), 2021-02-15
Supplement: Table_1.pdf [file Table_1.pdf]

**Supplementary Table: 1 Mean yield (kg/ha) of advance breeding lines in preliminary yield trials conducted in multi environments across Pakistan**

| Trial | Advance Lines                                                                                                                                                                                                                                                                                               | Mean Yield (kg/hectare)                                                                                                                                    | Environments                                                                                                    |
|-------|-------------------------------------------------------------------------------------------------------------------------------------------------------------------------------------------------------------------------------------------------------------------------------------------------------------|------------------------------------------------------------------------------------------------------------------------------------------------------------|-----------------------------------------------------------------------------------------------------------------|
| I     | CH19/07, 11030, D-10008, NIFA-3, Pb-2008, SL-05-64, CH49/09, D-09027, CH28/07, 09AG006, TG-1221, 12011, DCD, CH40/09, TG×228, TG×220, CH17/08, CH10/08, CH39/08, D-0039, CM1026/09, Bittle-16, <i>NIFA-1</i> , NIFA-2, AZC, TG-1218                                                                         | 2587, 2586, 2617, 2187, 2717, 2236, 2717, 2493, 2676, 2636, 2543, 2475, 2728, 2817, 2435, 2362, 2616, 2512, 2752, 2480, 2612, 2710, 1581, 2066, 2048, 2540 | Faisalabad, Karak, Bhakkar, Kallur Kot (Pb), Islamabad (Fed), Peshawar, D.I.Khan (KPK), Larkana (Sindh)         |
| II    | D-13011, D-13012, D-13029, D-13030, D-13031, D-13036, D-14005, D-14008, D-14013, D-14014, BRC-424, BRC-457, TG-1306, CH19/10, CH35/10, CH32/10, CM1036/09, <i>CM584/09</i> , Pb.2008, Bittal 2016                                                                                                           | 2131, 2241, 2073, 1764, 1894, 2248, 2181, 2048, 1952, 1928, 1972, 2173, 2067, 1923, 1992, 2075, 1898, 1881, 2073, 2112                                     | Faisalabad, Kallur Kot, Karor, Rakh-uttra, Bhakkar, Bahawalpur (Pb)                                             |
| III   | <i>QG-4</i> , TG12K-07, CH55/09, <i>QG-3</i> , K-1209, CH77/08, CH61/09, <i>DG-2017</i> , K-01216, K-01211, <i>QG-1</i> , Noor 2013, CH74/08, <i>TG12K-01</i> , K002-10, BKK2174, CH56/09, CH72/08, CH76/08                                                                                                 | 1613, 2173, 2250, 1663, 2126, 2137, 2207, 1562, 2275, 2224, 1549, 2038, 2189, 1912, 2259, 2161, 2209, 2165, 2146                                           | Faisalabad, Bhakkar, Chakwal, Kallur Kot (Pb), Islamabad (Fed), Karak DI Khan (KPK), Tando Jam, Larkana (Sindh) |
| IV    | <i>K-01241</i> , <i>K-01308</i> , <i>K-01242</i> , <i>K-01248</i> , <i>K-1221</i> , <i>K-01302</i> , <i>K-01250</i> , <i>CM877/10</i> , <i>CM616/10</i> , <i>K-01219</i> , <i>K-01240</i> , <i>K-01338</i> , Noor-2013, <i>TG12K05</i> , <i>TG12K01</i> , <i>CM545/10</i> , <i>TG12K10</i> , <i>TG12K02</i> | 1660, 1636, 1567, 1566, 1551, 1539, 1534, 1512, 1491, 1489, 1461, 1438, 1390, 1351, 1320, 1316, 1209, 1048                                                 | Faisalabad, Kallur Kot, Rakhuttra, Bhakkar, Bahawalpur, Chakwal, Fateh Jang                                     |

Sequence of genotypes and means are in order from Left to Right. Commercial varieties are shown in bold. Low Yielding are shown in Italics.
