# Supplementary material for: A Comparative Study for Assessing the Drought-Tolerance of Chickpea Under Varying Natural Growth Environments
Source: PubMed Central journal article supplement (PMC7928316; doi:10.3389/fpls.2020.607869), 2021-02-15
Supplement: Table_2.pdf [file Table_2.pdf]

**Supplementary Table: 2** Rankings of 80 chickpea genotypes on AMMI-Estimates for mean seed yield (g/plot) in six environments

| Code | Genotype | Desc.  | Status    | Source    | Ranked on AMMI-Estimates (g/plot) |       |       |       |       |       |
|------|----------|--------|-----------|-----------|-----------------------------------|-------|-------|-------|-------|-------|
|      |          |        |           |           | Env-1                             | Env-2 | Env-3 | Env-4 | Env-5 | Env-6 |
| G1   | CH40/09  | Desi   | Adv. line | NIAB-Fsd  | G64                               | G73   | G48   | G48   | G3    | G49   |
| G2   | CH39/08  | Desi   | Adv. line | NIAB-Fsd  | G42                               | G10   | G2    | G2    | G11   | G14   |
| G3   | DCD      | Desi   | Adv. line | AZRI-DIK  | G53                               | G14   | G41   | G49   | G73   | G48   |
| G4   | CH49/09  | Desi   | Adv. line | NIAB-Fsd  | G52                               | G11   | G49   | G11   | G10   | G73   |
| G5   | NIFA-2   | Desi   | Adv. line | NIFA-PSR  | G62                               | G9    | G63   | G8    | G18   | G16   |
| G6   | AZC      | Desi   | Adv. line | AZRI-BWP  | G14                               | G16   | G19   | G10   | G77   | G10   |
| G7   | NIFA-1   | Desi   | Adv. line | NIFA-PSR  | G16                               | G12   | G57   | G9    | G9    | G42   |
| G8   | D-13036  | Desi   | Adv. line | AARI-Fsd  | G23                               | G20   | G74   | G73   | G20   | G9    |
| G9   | D-13012  | Desi   | Adv. line | AARI-Fsd  | G73                               | G8    | G60   | G3    | G22   | G8    |
| G10  | D-14005  | Desi   | Adv. line | AARI-Fsd  | G71                               | G18   | G1    | G1    | G17   | G57   |
| G11  | BRC-457  | Desi   | Adv. line | -----     | G21                               | G49   | G45   | G19   | G8    | G53   |
| G12  | D-13011  | Desi   | Adv. line | AARI-Fsd  | G49                               | G17   | G44   | G14   | G12   | G23   |
| G13  | CH32/10  | Desi   | Adv. line | NIAB-Fsd  | G60                               | G21   | G51   | G17   | G78   | G62   |
| G14  | D-13029  | Desi   | Adv. line | AARI-Fsd  | G68                               | G77   | G36   | G76   | G14   | G2    |
| G15  | D-13031  | Desi   | Adv. line | AARI-Fsd  | G57                               | G3    | G58   | G12   | G29   | G12   |
| G16  | CM584/09 | Desi   | Adv. line | NIAB-Fsd  | G63                               | G23   | G54   | G13   | G2    | G58   |
| G17  | D-13030  | Desi   | Adv. line | AARI-Fsd  | G10                               | G29   | G37   | G4    | G76   | G51   |
| G18  | K-01216  | Kabuli | Adv. line | AARI-Fsd  | G12                               | G15   | G8    | G16   | G4    | G17   |
| G19  | K002-10  | Kabuli | Adv. line | AARI-Fsd  | G58                               | G78   | G13   | G56   | G1    | G21   |
| G20  | CH55/09  | Kabuli | Adv. line | NIAB-Fsd  | G72                               | G4    | G76   | G57   | G33   | G52   |
| G21  | K-01211  | Kabuli | Adv. line | AARI-Fsd  | G9                                | G48   | G59   | G78   | G16   | G11   |
| G22  | CH56/09  | Kabuli | Adv. line | NIAB-Fsd  | G51                               | G53   | G24   | G18   | G49   | G63   |
| G23  | CH61/09  | Kabuli | Adv. line | NIAB-Fsd  | G69                               | G72   | G56   | G59   | G13   | G68   |
| G24  | CH74/08  | Kabuli | Adv. line | NIAB-Fsd  | G20                               | G2    | G39   | G54   | G56   | G64   |
| G25  | TG12K-07 | Kabuli | Adv. line | AZRI-Bhk  | G8                                | G42   | G25   | G77   | G21   | G60   |
| G26  | CH72/08  | Kabuli | Adv. line | NIAB-Fsd  | G70                               | G13   | G68   | G58   | G80   | G20   |
| G27  | BKK2174  | Kabuli | Adv. line | NIAB-Fsd  | G28                               | G56   | G14   | G51   | G15   | G74   |
| G28  | CH76/08  | Kabuli | Adv. line | NIAB-Fsd  | G74                               | G58   | G4    | G25   | G27   | G4    |
| G29  | CH77/08  | Kabuli | Adv. line | NIAB-Fsd  | G15                               | G76   | G9    | G80   | G48   | G13   |
| G30  | K-01209  | Kabuli | Adv. line | AARI-Fsd  | G26                               | G71   | G42   | G20   | G61   | G15   |
| G31  | DG-2017  | Kabuli | Adv. line | Dokri-Lrk | G48                               | G25   | G16   | G27   | G47   | G41   |
| G32  | QG-1     | Kabuli | Adv. line | QAARI-Lrk | G50                               | G62   | G11   | G41   | G59   | G25   |
| G33  | K-01241  | Kabuli | Adv. line | AARI-Fsd  | G17                               | G22   | G80   | G22   | G19   | G56   |
| G34  | K-01308  | Kabuli | Adv. line | AARI-Fsd  | G67                               | G61   | G62   | G15   | G72   | G54   |
| G35  | K-01242  | Kabuli | Adv. line | AARI-Fsd  | G25                               | G57   | G17   | G74   | G25   | G18   |
| G36  | K-01248  | Kabuli | Adv. line | AARI-Fsd  | G4                                | G59   | G40   | G47   | G54   | G59   |
| G37  | K-1221   | Kabuli | Adv. line | AARI-Fsd  | G61                               | G52   | G64   | G29   | G6    | G28   |
| G38  | K-01302  | Kabuli | Adv. line | AARI-Fsd  | G41                               | G51   | G38   | G36   | G5    | G76   |
| G39  | K-01250  | Kabuli | Adv. line | AARI-Fsd  | G7                                | G80   | G27   | G33   | G66   | G29   |
| G40  | CM877/10 | Kabuli | Adv. line | NIAB-Fsd  | G24                               | G26   | G47   | G37   | G55   | G77   |
| G41  | CM616/10 | Kabuli | Adv. line | NIAB-Fsd  | G5                                | G27   | G28   | G23   | G26   | G19   |
| G42  | K-01219  | Kabuli | Adv. line | AARI-Fsd  | G29                               | G54   | G10   | G66   | G58   | G78   |
| G43  | K-01240  | Kabuli | Adv. line | AARI-Fsd  | G35                               | G6    | G23   | G24   | G23   | G24   |

|            |                |        |            |          |     |     |     |     |     |     |
|------------|----------------|--------|------------|----------|-----|-----|-----|-----|-----|-----|
| <b>G44</b> | <i>K-01338</i> | Kabuli | Adv. line  | AARI-Fsd | G6  | G5  | G79 | G21 | G79 | G1  |
| <b>G45</b> | <i>TG12K10</i> | Kabuli | Adv. line  | AZRI-Bhk | G66 | G66 | G12 | G55 | G34 | G37 |
| <b>G46</b> | <i>TG12K02</i> | Kabuli | Adv. line  | AZRI-Bhk | G18 | G1  | G70 | G6  | G43 | G72 |
| <b>G47</b> | 09 AG 006      | Desi   | Adv. line  | NIAB-Fsd | G45 | G28 | G66 | G79 | G50 | G71 |
| <b>G48</b> | CH28/07        | Desi   | Adv. line  | NIAB-Fsd | G13 | G68 | G78 | G68 | G75 | G66 |
| <b>G49</b> | CH10/08        | Desi   | Adv. line  | NIAB-Fsd | G56 | G50 | G55 | G42 | G51 | G6  |
| <b>G50</b> | CM1036-09      | Desi   | Adv. line  | NIAB-Fsd | G54 | G33 | G30 | G28 | G71 | G80 |
| <b>G51</b> | CH 1/11        | Desi   | Adv. line  | NIAB-Fsd | G59 | G55 | G35 | G63 | G28 | G50 |
| <b>G52</b> | CH 2/11        | Desi   | Adv. line  | NIAB-Fsd | G37 | G67 | G73 | G62 | G67 | G27 |
| <b>G53</b> | CH 3/11        | Desi   | Adv. line  | NIAB-Fsd | G77 | G19 | G15 | G44 | G57 | G5  |
| <b>G54</b> | CH13/11        | Desi   | Adv. line  | NIAB-Fsd | G65 | G47 | G6  | G5  | G36 | G26 |
| <b>G55</b> | CH50/11        | Desi   | Adv. line  | NIAB-Fsd | G11 | G79 | G33 | G34 | G37 | G45 |
| <b>G56</b> | CH28/10        | Desi   | Adv. line  | NIAB-Fsd | G38 | G24 | G53 | G53 | G53 | G3  |
| <b>G57</b> | CH63/11        | Kabuli | Adv. line  | NIAB-Fsd | G30 | G74 | G3  | G50 | G24 | G55 |
| <b>G58</b> | CH61/10        | Kabuli | Adv. line  | NIAB-Fsd | G55 | G37 | G34 | G39 | G68 | G70 |
| <b>G59</b> | CH69/09        | Kabuli | Adv. line  | NIAB-Fsd | G2  | G34 | G52 | G45 | G46 | G36 |
| <b>G60</b> | CH54/07        | Desi   | Adv. line  | NIAB-Fsd | G78 | G75 | G50 | G26 | G62 | G61 |
| <b>G61</b> | Karak-2        | Desi   | Adv. line  | ARS-Krk  | G76 | G7  | G5  | G60 | G42 | G35 |
| <b>G62</b> | PB-2000        | Desi   | Adv. line  | AARI-Fsd | G27 | G35 | G29 | G61 | G7  | G79 |
| <b>G63</b> | D-07509        | Desi   | Adv. line  | AARI-Fsd | G46 | G36 | G69 | G38 | G30 | G67 |
| <b>G64</b> | CH-23/00       | Kabuli | Adv. line  | NIAB-Fsd | G80 | G43 | G18 | G40 | G35 | G38 |
| <b>G65</b> | ILC-3279       | Desi   | Trad. line | ICRISAT  | G79 | G30 | G32 | G72 | G40 | G69 |
| <b>G66</b> | Bittel-16      | Desi   | Cultivar   | AARI-Fsd | G75 | G46 | G77 | G30 | G52 | G47 |
| <b>G67</b> | CM-88          | Desi   | Adv. line  | NIAB-Fsd | G32 | G41 | G20 | G35 | G74 | G44 |
| <b>G68</b> | CH-2016        | Desi   | Adv. line  | NIAB-Fsd | G36 | G38 | G22 | G52 | G38 | G30 |
| <b>G69</b> | Paidar-91      | Desi   | Cultivar   | AARI-Fsd | G44 | G60 | G21 | G43 | G39 | G7  |
| <b>G70</b> | E-26           | Desi   | Trad. line | ICRISAT  | G34 | G70 | G46 | G67 | G65 | G33 |
| <b>G71</b> | Karak-98       | Desi   | Adv. line  | NIFA-PSR | G19 | G63 | G7  | G46 | G44 | G22 |
| <b>G72</b> | 6153           | Desi   | Trad. line | ICRISAT  | G1  | G64 | G26 | G75 | G41 | G34 |
| <b>G73</b> | CH15/11        | Desi   | Adv. line  | NIAB-Fsd | G39 | G65 | G43 | G7  | G31 | G39 |
| <b>G74</b> | K-850          | Desi   | Trad. line | ICRISAT  | G47 | G69 | G31 | G70 | G70 | G46 |
| <b>G75</b> | Aug 424        | Desi   | Cultivar   | ICRISAT  | G43 | G39 | G67 | G71 | G69 | G75 |
| <b>G76</b> | BKK 2174       | Desi   | Adv. line  | NIAB-Fsd | G33 | G44 | G61 | G69 | G45 | G43 |
| <b>G77</b> | CH74/10        | Kabuli | Adv. line  | NIAB-Fsd | G22 | G45 | G75 | G64 | G32 | G40 |
| <b>G78</b> | BK-2011        | Desi   | Cultivar   | AZRI-Bhk | G3  | G40 | G72 | G31 | G63 | G65 |
| <b>G79</b> | Noor-13        | Kabuli | Cultivar   | AARI-Fsd | G31 | G32 | G71 | G32 | G60 | G32 |
| <b>G80</b> | CM2008         | Kabuli | Cultivar   | NIAB-Fsd | G40 | G31 | G65 | G65 | G64 | G31 |

Abbreviation: Descriptor (Desc.)
