# Supplementary material for: A Comparative Study for Assessing the Drought-Tolerance of Chickpea Under Varying Natural Growth Environments
Source: PubMed Central journal article supplement (PMC7928316; doi:10.3389/fpls.2020.607869), 2021-02-15
Supplement: Table_3.pdf [file Table_3.pdf]

**Supplementary Table 3:** Seed mean yield (SYm), Rank of yield (RY), AMMI stability value (ASV), ranks of ASV (RASV) and Genotype Selection Index (GSI) based ranking of 80 chickpea genotypes

| S # | Code | Genotype | GYm | RY | ASV | RASV | GSI | S # | Code | Genotype  | GYm | RY | ASV | RASV | GSI |
|-----|------|----------|-----|----|-----|------|-----|-----|------|-----------|-----|----|-----|------|-----|
| 1   | G48  | CH28/07  | 658 | 1  | 13  | 7    | 8   | 41  | G68  | CH-2016   | 482 | 37 | 6   | 40   | 77  |
| 2   | G2   | CH39/08  | 605 | 6  | 10  | 14   | 20  | 42  | G61  | Karak-2   | 412 | 60 | 9   | 22   | 82  |
| 3   | G11  | BRC-457  | 591 | 9  | 11  | 12   | 21  | 43  | G4   | CH49/09   | 527 | 16 | 3   | 67   | 83  |
| 4   | G73  | CH15/11  | 627 | 3  | 9   | 19   | 22  | 44  | G36  | K-01248   | 437 | 50 | 7   | 35   | 85  |
| 5   | G3   | DCD      | 513 | 25 | 16  | 4    | 29  | 45  | G13  | CH32/10   | 521 | 20 | 3   | 68   | 88  |
| 6   | G10  | D-14005  | 614 | 5  | 9   | 24   | 29  | 46  | G33  | K-01241   | 424 | 57 | 7   | 33   | 90  |
| 7   | G18  | K-01216  | 520 | 21 | 11  | 11   | 32  | 47  | G15  | D-13031   | 499 | 34 | 4   | 57   | 91  |
| 8   | G20  | CH55/09  | 526 | 17 | 10  | 16   | 33  | 48  | G37  | K-1221    | 454 | 45 | 5   | 48   | 93  |
| 9   | G42  | K-01219  | 523 | 18 | 9   | 20   | 38  | 49  | G54  | CH13/11   | 499 | 33 | 4   | 60   | 93  |
| 10  | G77  | CH74/10  | 501 | 32 | 12  | 10   | 42  | 50  | G56  | CH28/10   | 513 | 24 | 3   | 69   | 93  |
| 11  | G57  | CH63/11  | 552 | 13 | 8   | 30   | 43  | 51  | G80  | CM2008    | 475 | 40 | 4   | 53   | 93  |
| 12  | G41  | CM616/10 | 479 | 39 | 14  | 5    | 44  | 52  | G27  | BKK2174   | 467 | 41 | 4   | 55   | 96  |
| 13  | G63  | D-07509  | 461 | 42 | 17  | 2    | 44  | 53  | G70  | E-26      | 372 | 70 | 8   | 26   | 96  |
| 14  | G19  | K002-10  | 509 | 27 | 9   | 18   | 45  | 54  | G47  | 09 AG 006 | 430 | 56 | 6   | 42   | 98  |
| 15  | G1   | CH40/09  | 515 | 22 | 9   | 25   | 47  | 55  | G69  | Paidar-91 | 330 | 76 | 9   | 23   | 99  |
| 16  | G49  | CH10/08  | 650 | 2  | 5   | 47   | 49  | 56  | G59  | CH69/09   | 502 | 30 | 3   | 70   | 100 |
| 17  | G74  | K-850    | 488 | 36 | 10  | 15   | 51  | 57  | G24  | CH74/08   | 452 | 47 | 4   | 56   | 103 |
| 18  | G12  | D-13011  | 564 | 11 | 6   | 41   | 52  | 58  | G26  | CH72/08   | 422 | 58 | 6   | 46   | 104 |
| 19  | G60  | CH54/07  | 446 | 49 | 16  | 3    | 52  | 59  | G67  | CM-88     | 379 | 68 | 6   | 37   | 105 |
| 20  | G21  | K-01211  | 509 | 26 | 8   | 27   | 53  | 60  | G25  | TG12K-07  | 503 | 28 | 2   | 78   | 106 |
| 21  | G17  | D-13030  | 560 | 12 | 6   | 43   | 55  | 61  | G39  | K-01250   | 359 | 71 | 6   | 36   | 107 |
| 22  | G53  | CH 3/11  | 502 | 29 | 8   | 28   | 57  | 62  | G65  | ILC-3279  | 258 | 78 | 8   | 31   | 109 |
| 23  | G9   | D-13012  | 598 | 8  | 5   | 51   | 59  | 63  | G75  | Aug 424   | 335 | 75 | 6   | 39   | 114 |
| 24  | G51  | CH 1/11  | 527 | 15 | 6   | 45   | 60  | 64  | G40  | CM877/10  | 326 | 77 | 6   | 38   | 115 |
| 25  | G62  | PB-2000  | 502 | 31 | 8   | 29   | 60  | 65  | G5   | NIFA-2    | 435 | 51 | 3   | 65   | 116 |
| 26  | G14  | D-13029  | 625 | 4  | 4   | 58   | 62  | 66  | G28  | CH76/08   | 461 | 44 | 2   | 73   | 117 |
| 27  | G22  | CH56/09  | 432 | 54 | 12  | 8    | 62  | 67  | G38  | K-01302   | 383 | 67 | 4   | 54   | 121 |
| 28  | G52  | CH 2/11  | 461 | 43 | 9   | 21   | 64  | 68  | G6   | AZC       | 448 | 48 | 2   | 75   | 123 |
| 29  | G64  | CH-23/00 | 391 | 63 | 20  | 1    | 64  | 69  | G32  | QG-1      | 251 | 79 | 6   | 44   | 123 |
| 30  | G78  | BK-2011  | 499 | 35 | 7   | 32   | 67  | 70  | G43  | K-01240   | 337 | 74 | 5   | 49   | 123 |
| 31  | G45  | TG12K10  | 392 | 62 | 13  | 6    | 68  | 71  | G66  | Bittel-16 | 453 | 46 | 2   | 79   | 125 |
| 32  | G8   | D-13036  | 599 | 7  | 4   | 62   | 69  | 72  | G50  | CM1036/09 | 430 | 55 | 2   | 72   | 127 |
| 33  | G23  | CH61/09  | 522 | 19 | 5   | 50   | 69  | 73  | G34  | K-01308   | 389 | 65 | 4   | 63   | 128 |
| 34  | G72  | 6153     | 434 | 52 | 10  | 17   | 69  | 74  | G55  | CH50/11   | 434 | 53 | 2   | 76   | 129 |
| 35  | G71  | Karak-98 | 400 | 61 | 12  | 9    | 70  | 75  | G35  | K-01242   | 386 | 66 | 3   | 66   | 132 |
| 36  | G16  | CM584/09 | 588 | 10 | 4   | 61   | 71  | 76  | G79  | Noor-13   | 419 | 59 | 2   | 74   | 133 |
| 37  | G29  | CH77/08  | 481 | 38 | 7   | 34   | 72  | 77  | G7   | NIFA-1    | 359 | 72 | 4   | 64   | 136 |
| 38  | G58  | CH61/10  | 534 | 14 | 4   | 59   | 73  | 78  | G30  | K-01209   | 377 | 69 | 3   | 71   | 140 |
| 39  | G76  | BKK 2174 | 514 | 23 | 5   | 52   | 75  | 79  | G46  | TG12K02   | 340 | 73 | 2   | 77   | 150 |
| 40  | G44  | K-01338  | 389 | 64 | 10  | 13   | 77  | 80  | G31  | DG-2017   | 227 | 80 | 1   | 80   | 160 |
