# Supplementary material for: A Comparative Study for Assessing the Drought-Tolerance of Chickpea Under Varying Natural Growth Environments
Source: PubMed Central journal article supplement (PMC7928316; doi:10.3389/fpls.2020.607869), 2021-02-15
Supplement: Table_4.pdf [file Table_4.pdf]

**Supplementary Table: 4** Ranking of Genotypes on Mean Productivity (MP), Geometric Mean Productivity (GMP), Drought tolerance Index (TOL), Stress Tolerance Index (STI), Stress Susceptibility Index (SSI), Yield Index (YI) and Yield Stability Index (YSI). *R* denotes Rank.

| Code | Geno            | GYp  | GYs  | YR (%) | RGYp | Code | Geno               | Gyp  | RGYs | Code | Geno               | GYs  | RMP | Code | Geno               | MP   | RGMP | Code | Geno               | GMP  |
|------|-----------------|------|------|--------|------|------|--------------------|------|------|------|--------------------|------|-----|------|--------------------|------|------|------|--------------------|------|
| 1    | <i>K-01241</i>  | 1096 | 897  | 18     | 1    | 20   | CH39/08            | 1296 | 1    | 20   | CH39/08            | 1192 | 1   | 20   | CH39/08            | 1244 | 1    | 20   | CH39/08            | 1243 |
| 2    | <i>K-01308</i>  | 1072 | 863  | 19     | 2    | 19   | CH40/09            | 1232 | 2    | 12   | K-01211            | 1000 | 2   | 19   | CH40/09            | 1080 | 2    | 19   | CH40/09            | 1069 |
| 3    | <i>K-01242</i>  | 808  | 600  | 26     | 3    | 5    | <i>CM877/10</i>    | 1216 | 3    | 17   | DG-2017            | 992  | 3   | 12   | K-01211            | 1043 | 3    | 12   | K-01211            | 1042 |
| 4    | <i>K-01248</i>  | 1184 | 770  | 35     | 4    | 27   | CH15/11            | 1192 | 4    | 33   | D-13012            | 952  | 4   | 17   | DG-2017            | 1021 | 4    | 17   | DG-2017            | 1021 |
| 5    | <i>CM877/10</i> | 1216 | 624  | 49     | 5    | 4    | <i>K-01248</i>     | 1184 | 5    | 9    | K002-10            | 944  | 5   | 9    | K002-10            | 1016 | 5    | 9    | K002-10            | 1013 |
| 6    | <i>TG12K10</i>  | 1168 | 371  | 68     | 6    | 6    | <i>TG12K10</i>     | 1168 | 6    | 19   | CH40/09            | 928  | 6   | 26   | 09AG006            | 1008 | 6    | 26   | 09AG006            | 1002 |
| 7    | <i>TG12K02</i>  | 952  | 500  | 47     | 7    | 22   | Pb2008             | 1144 | 7    | 1    | <i>K-01241</i>     | 898  | 7   | 1    | <i>K-01241</i>     | 997  | 7    | 33   | D-13012            | 994  |
| 8    | K-01216         | 1024 | 848  | 17     | 8    | 16   | TG12K-07           | 1136 | 8    | 26   | 09AG006            | 896  | 8   | 33   | D-13012            | 995  | 8    | 1    | <i>K-01241</i>     | 992  |
| 9    | K002-10         | 1088 | 944  | 13     | 9    | 26   | 09AG006            | 1120 | 9    | 11   | <b>Noor2013</b>    | 888  | 9   | 27   | CH15/11            | 980  | 9    | 2    | <i>K-01308</i>     | 962  |
| 10   | CH55/09         | 945  | 800  | 15     | 10   | 36   | D-13011            | 1112 | 10   | 15   | CH74/08            | 881  | 10  | 4    | <i>K-01248</i>     | 977  | 10   | 27   | CH15/11            | 958  |
| 11   | <b>Noor2013</b> | 1031 | 888  | 14     | 11   | 23   | CH49/09            | 1104 | 11   | 2    | <i>K-01308</i>     | 863  | 11  | 2    | <i>K-01308</i>     | 967  | 11   | 15   | CH74/08            | 957  |
| 12   | K-01211         | 1086 | 1000 | 8      | 12   | 1    | <i>K-01241</i>     | 1096 | 12   | 8    | K-01216            | 848  | 12  | 16   | TG12K-07           | 964  | 12   | 11   | <b>Noor2013</b>    | 957  |
| 13   | CH56/09         | 896  | 760  | 15     | 13   | 18   | <i>QG-1</i>        | 1096 | 13   | 18   | <i>QG-1</i>        | 819  | 13  | 28   | 13029              | 964  | 13   | 4    | <i>K-01248</i>     | 955  |
| 14   | CH61/09         | 984  | 640  | 35     | 14   | 32   | <b>Bittel-2016</b> | 1096 | 14   | 35   | BRC-457            | 817  | 14  | 15   | CH74/08            | 960  | 14   | 28   | 13029              | 949  |
| 15   | CH74/08         | 1040 | 880  | 15     | 15   | 9    | K002-10            | 1088 | 15   | 10   | CH55/09            | 800  | 15  | 11   | <b>Noor2013</b>    | 959  | 15   | 16   | TG12K-07           | 949  |
| 16   | TG12K-07        | 1136 | 792  | 30     | 16   | 12   | K-01211            | 1086 | 16   | 37   | CH32/10            | 794  | 16  | 18   | <i>QG-1</i>        | 958  | 16   | 18   | <i>QG-1</i>        | 948  |
| 17   | DG-2017         | 1050 | 992  | 6      | 17   | 2    | <i>K-01308</i>     | 1072 | 17   | 16   | TG12K-07           | 792  | 17  | 23   | CH49/09            | 948  | 17   | 23   | CH49/09            | 935  |
| 18   | <i>QG-1</i>     | 1096 | 819  | 25     | 18   | 17   | DG-2017            | 1050 | 18   | 23   | CH49/09            | 792  | 18  | 8    | K-01216            | 936  | 18   | 8    | K-01216            | 932  |
| 19   | CH40/09         | 1232 | 928  | 25     | 19   | 15   | CH74/08            | 1040 | 19   | 28   | 13029              | 792  | 19  | 22   | Pb2008             | 936  | 19   | 32   | <b>Bittel-2016</b> | 916  |
| 20   | CH39/08         | 1296 | 1192 | 8      | 20   | 21   | DCD                | 1040 | 20   | 38   | <i>CM584/09</i>    | 792  | 20  | 32   | <b>Bittel-2016</b> | 931  | 20   | 22   | Pb2008             | 913  |
| 21   | DCD             | 1040 | 688  | 34     | 21   | 33   | D-13012            | 1038 | 21   | 34   | D-14005            | 784  | 21  | 5    | <i>CM877/10</i>    | 920  | 21   | 36   | D-13011            | 895  |
| 22   | Pb2008          | 1144 | 728  | 36     | 22   | 25   | CH28/07            | 1032 | 22   | 24   | CH10/08            | 780  | 22  | 36   | D-13011            | 916  | 22   | 37   | CH32/10            | 888  |
| 23   | CH49/09         | 1104 | 792  | 28     | 23   | 11   | <b>Noor2013</b>    | 1031 | 23   | 4    | <i>K-01248</i>     | 770  | 23  | 37   | CH32/10            | 893  | 23   | 34   | D-14005            | 880  |
| 24   | CH10/08         | 888  | 780  | 12     | 24   | 8    | K-01216            | 1024 | 24   | 27   | CH15/11            | 770  | 24  | 25   | CH28/07            | 889  | 24   | 25   | CH28/07            | 877  |
| 25   | CH28/07         | 1032 | 745  | 28     | 25   | 37   | CH32/10            | 992  | 25   | 32   | <b>Bittel-2016</b> | 766  | 25  | 34   | D-14005            | 886  | 25   | 5    | <i>CM877/10</i>    | 871  |
| 26   | 09AG006         | 1120 | 896  | 20     | 26   | 39   | D-13030            | 992  | 26   | 13   | CH56/09            | 760  | 26  | 10   | CH55/09            | 872  | 26   | 10   | CH55/09            | 869  |
| 27   | CH15/11         | 1192 | 769  | 35     | 27   | 34   | D-14005            | 988  | 27   | 40   | <b>BK-2011</b>     | 747  | 27  | 21   | DCD                | 864  | 27   | 21   | DCD                | 846  |

|    |                   |      |     |    |    |    |                 |     |    |    |                 |     |    |    |                 |     |    |    |                 |     |
|----|-------------------|------|-----|----|----|----|-----------------|-----|----|----|-----------------|-----|----|----|-----------------|-----|----|----|-----------------|-----|
| 28 | 13029             | 976  | 792 | 19 | 28 | 14 | CH61/09         | 984 | 28 | 25 | CH28/07         | 746 | 28 | 39 | D-13030         | 848 | 28 | 40 | <b>BK-2011</b>  | 836 |
| 29 | AZC               | 976  | 701 | 28 | 29 | 28 | 13029           | 976 | 29 | 22 | Pb2008          | 728 | 29 | 40 | <b>BK-2011</b>  | 841 | 29 | 39 | D-13030         | 836 |
| 30 | <i>NIFA-1</i>     | 848  | 620 | 27 | 30 | 29 | AZC             | 976 | 30 | 36 | D-13011         | 720 | 30 | 29 | AZC             | 839 | 30 | 35 | BRC-457         | 832 |
| 31 | D-13036           | 928  | 657 | 29 | 31 | 7  | <i>TG12K02</i>  | 952 | 31 | 39 | D-13030         | 704 | 31 | 24 | CH10/08         | 834 | 31 | 24 | CH10/08         | 832 |
| 32 | <b>Bittel2016</b> | 1096 | 765 | 30 | 32 | 10 | CH55/09         | 944 | 32 | 29 | AZC             | 702 | 32 | 35 | BRC-457         | 832 | 32 | 29 | AZC             | 828 |
| 33 | D-13012           | 1037 | 952 | 8  | 33 | 40 | <b>BK-2011</b>  | 936 | 33 | 21 | DCD             | 688 | 33 | 13 | CH56/09         | 828 | 33 | 13 | CH56/09         | 825 |
| 34 | D-14005           | 988  | 784 | 21 | 34 | 31 | D-13036         | 928 | 34 | 31 | D-13036         | 658 | 34 | 14 | CH61/09         | 812 | 34 | 38 | <i>CM584/09</i> | 808 |
| 35 | BRC-457           | 848  | 816 | 4  | 35 | 13 | CH56/09         | 896 | 35 | 14 | CH61/09         | 640 | 35 | 38 | <i>CM584/09</i> | 808 | 35 | 14 | CH61/09         | 794 |
| 36 | D-13011           | 1112 | 720 | 35 | 36 | 24 | CH10/08         | 888 | 36 | 5  | <i>CM877/10</i> | 624 | 36 | 31 | D-13036         | 793 | 36 | 31 | D-13036         | 781 |
| 37 | CH32/10           | 992  | 794 | 20 | 37 | 30 | <i>NIFA-1</i>   | 848 | 37 | 30 | <i>NIFA-1</i>   | 621 | 37 | 6  | <i>TG12K10</i>  | 770 | 37 | 30 | <i>NIFA-1</i>   | 726 |
| 38 | <i>CM584/09</i>   | 824  | 792 | 4  | 38 | 35 | BRC-457         | 848 | 38 | 3  | <i>K-01242</i>  | 601 | 38 | 30 | <i>NIFA-1</i>   | 734 | 38 | 3  | <i>K-01242</i>  | 697 |
| 39 | D-13030           | 992  | 704 | 29 | 39 | 38 | <i>CM584/09</i> | 824 | 39 | 7  | <i>TG12K02</i>  | 501 | 39 | 7  | <i>TG12K02</i>  | 726 | 39 | 7  | <i>TG12K02</i>  | 690 |
| 40 | BK-2011           | 936  | 747 | 20 | 40 | 3  | <i>K-01242</i>  | 808 | 40 | 6  | <i>TG12K10</i>  | 371 | 40 | 3  | <i>K-01242</i>  | 704 | 40 | 6  | <i>TG12K10</i>  | 658 |

| RTOL | Code | Genotype           | TOL | RSTI | Code | Genotype           | STI  | RSSI | Code | Genotype           | SSI | RYI | Code | Genotype        | YI   | RYSI | Code | Genotype        | YSI  |
|------|------|--------------------|-----|------|------|--------------------|------|------|------|--------------------|-----|-----|------|-----------------|------|------|------|-----------------|------|
| 1    | 6    | <i>TG12K10</i>     | 797 | 1    | 20   | CH39/08            | 1.44 | 1    | 6    | <i>TG12K10</i>     | 2.8 | 1   | 20   | CH39/08         | 1.52 | 1    | 35   | BRC-457         | 0.96 |
| 2    | 5    | <i>CM877/10</i>    | 592 | 2    | 19   | CH40/09            | 1.06 | 2    | 5    | <i>CM877/10</i>    | 2   | 2   | 12   | K-01211         | 1.28 | 2    | 38   | <i>CM584/09</i> | 0.96 |
| 3    | 7    | <i>TG12K02</i>     | 451 | 3    | 12   | K-01211            | 1.01 | 3    | 7    | <i>TG12K02</i>     | 1.9 | 3   | 17   | DG-2017         | 1.27 | 3    | 17   | DG-2017         | 0.94 |
| 4    | 27   | CH15/11            | 422 | 4    | 17   | DG-2017            | 0.97 | 4    | 22   | Pb2008             | 1.5 | 4   | 33   | D-13012         | 1.21 | 4    | 12   | K-01211         | 0.92 |
| 5    | 22   | Pb2008             | 416 | 5    | 9    | K002-10            | 0.96 | 5    | 27   | CH15/11            | 1.5 | 5   | 9    | K002-10         | 1.2  | 5    | 20   | CH39/08         | 0.92 |
| 6    | 4    | <i>K-01248</i>     | 414 | 6    | 26   | 09AG006            | 0.93 | 6    | 36   | D-13011            | 1.4 | 6   | 19   | CH40/09         | 1.18 | 6    | 33   | D-13012         | 0.92 |
| 7    | 36   | D-13011            | 392 | 7    | 33   | D-13012            | 0.92 | 7    | 14   | CH61/09            | 1.4 | 7   | 1    | <i>K-01241</i>  | 1.14 | 7    | 24   | CH10/08         | 0.88 |
| 8    | 21   | DCD                | 352 | 8    | 1    | <i>K-01241</i>     | 0.92 | 8    | 4    | <i>K-01248</i>     | 1.4 | 8   | 26   | 09AG006         | 1.14 | 8    | 9    | K002-10         | 0.87 |
| 9    | 14   | CH61/09            | 344 | 9    | 2    | <i>K-01308</i>     | 0.86 | 9    | 21   | DCD                | 1.4 | 9   | 11   | <b>Noor2013</b> | 1.13 | 9    | 11   | <b>Noor2013</b> | 0.86 |
| 10   | 16   | TG12K-07           | 344 | 10   | 27   | CH15/11            | 0.85 | 10   | 16   | TG12K-07           | 1.2 | 10  | 15   | CH74/08         | 1.12 | 10   | 13   | CH56/09         | 0.85 |
| 11   | 32   | <b>Bittel-2016</b> | 330 | 11   | 15   | CH74/08            | 0.85 | 11   | 32   | <b>Bittel-2016</b> | 1.2 | 11  | 2    | <i>K-01308</i>  | 1.1  | 11   | 15   | CH74/08         | 0.85 |
| 12   | 23   | CH49/09            | 312 | 12   | 11   | <b>Noor2013</b>    | 0.85 | 12   | 31   | D-13036            | 1.2 | 12  | 8    | K-01216         | 1.08 | 12   | 10   | CH55/09         | 0.85 |
| 13   | 19   | CH40/09            | 304 | 13   | 4    | <i>K-01248</i>     | 0.85 | 13   | 39   | D-13030            | 1.2 | 13  | 18   | <i>QG-1</i>     | 1.04 | 13   | 8    | K-01216         | 0.83 |
| 14   | 39   | D-13030            | 288 | 14   | 16   | TG12K-07           | 0.84 | 14   | 23   | CH49/09            | 1.2 | 14  | 35   | BRC-457         | 1.04 | 14   | 1    | <i>K-01241</i>  | 0.82 |
| 15   | 25   | CH28/07            | 286 | 15   | 18   | <i>QG-1</i>        | 0.84 | 15   | 29   | AZC                | 1.2 | 15  | 10   | CH55/09         | 1.02 | 15   | 28   | 13029           | 0.81 |
| 16   | 18   | <i>QG-1</i>        | 277 | 16   | 23   | CH49/09            | 0.81 | 16   | 25   | CH28/07            | 1.1 | 16  | 37   | CH32/10         | 1.01 | 16   | 2    | <i>K-01308</i>  | 0.81 |
| 17   | 29   | AZC                | 274 | 17   | 8    | K-01216            | 0.81 | 17   | 30   | <i>NIFA-1</i>      | 1.1 | 17  | 16   | TG12K-07        | 1.01 | 17   | 37   | CH32/10         | 0.8  |
| 18   | 31   | D-13036            | 270 | 18   | 32   | <b>Bittel-2016</b> | 0.78 | 18   | 3    | <i>K-01242</i>     | 1.1 | 18  | 23   | CH49/09         | 1.01 | 18   | 26   | 09AG006         | 0.8  |
| 19   | 30   | <i>NIFA-1</i>      | 227 | 19   | 22   | Pb2008             | 0.77 | 19   | 18   | <i>QG-1</i>        | 1   | 19  | 28   | 13029           | 1.01 | 19   | 40   | BK-2011         | 0.8  |
| 20   | 26   | 09AG006            | 224 | 20   | 36   | D-13011            | 0.74 | 20   | 19   | CH40/09            | 1   | 20  | 38   | <i>CM584/09</i> | 1.01 | 20   | 34   | D-14005         | 0.79 |

|    |    |                 |     |    |    |                |      |    |    |                 |     |    |    |                    |      |    |    |                    |      |
|----|----|-----------------|-----|----|----|----------------|------|----|----|-----------------|-----|----|----|--------------------|------|----|----|--------------------|------|
| 21 | 2  | K-01308         | 209 | 21 | 37 | CH32/10        | 0.73 | 21 | 34 | D-14005         | 0.8 | 21 | 34 | D-14005            | 1    | 21 | 19 | CH40/09            | 0.75 |
| 22 | 3  | K-01242         | 207 | 22 | 34 | D-14005        | 0.72 | 22 | 40 | BK-2011         | 0.8 | 22 | 24 | CH10/08            | 0.99 | 22 | 18 | QG-1               | 0.75 |
| 23 | 34 | D-14005         | 204 | 23 | 28 | 13029          | 0.72 | 23 | 26 | 09AG006         | 0.8 | 23 | 4  | K-01248            | 0.98 | 23 | 3  | K-01242            | 0.74 |
| 24 | 1  | K-01241         | 198 | 24 | 25 | CH28/07        | 0.72 | 24 | 37 | CH32/10         | 0.8 | 24 | 27 | CH15/11            | 0.98 | 24 | 30 | NIFA-1             | 0.73 |
| 25 | 37 | CH32/10         | 198 | 25 | 5  | CM877/10       | 0.71 | 25 | 2  | K-01308         | 0.8 | 25 | 32 | <b>Bittel-2016</b> | 0.98 | 25 | 25 | CH28/07            | 0.72 |
| 26 | 40 | <b>BK-2011</b>  | 189 | 26 | 10 | CH55/09        | 0.7  | 26 | 28 | 13029           | 0.8 | 26 | 13 | CH56/09            | 0.97 | 26 | 29 | AZC                | 0.72 |
| 27 | 28 | 13029           | 184 | 27 | 21 | DCD            | 0.67 | 27 | 1  | K-01241         | 0.7 | 27 | 40 | BK-2011            | 0.95 | 27 | 23 | CH49/09            | 0.72 |
| 28 | 8  | K-01216         | 176 | 28 | 40 | <b>BK-2011</b> | 0.65 | 28 | 8  | K-01216         | 0.7 | 28 | 25 | CH28/07            | 0.95 | 28 | 39 | D-13030            | 0.71 |
| 29 | 15 | CH74/08         | 159 | 29 | 39 | D-13030        | 0.65 | 29 | 15 | CH74/08         | 0.6 | 29 | 22 | Pb2008             | 0.93 | 29 | 31 | D-13036            | 0.71 |
| 30 | 9  | K002-10         | 144 | 30 | 35 | BRC-457        | 0.64 | 30 | 10 | CH55/09         | 0.6 | 30 | 36 | D-13011            | 0.92 | 30 | 32 | <b>Bittel-2016</b> | 0.7  |
| 31 | 10 | CH55/09         | 144 | 31 | 24 | CH10/08        | 0.64 | 31 | 13 | CH56/09         | 0.6 | 31 | 39 | D-13030            | 0.9  | 31 | 16 | TG12K-07           | 0.7  |
| 32 | 11 | <b>Noor2013</b> | 143 | 32 | 29 | AZC            | 0.64 | 32 | 11 | <b>Noor2013</b> | 0.6 | 32 | 29 | AZC                | 0.89 | 32 | 21 | DCD                | 0.66 |
| 33 | 13 | CH56/09         | 136 | 33 | 13 | CH56/09        | 0.63 | 33 | 9  | K002-10         | 0.5 | 33 | 21 | DCD                | 0.88 | 33 | 4  | K-01248            | 0.65 |
| 34 | 24 | CH10/08         | 108 | 34 | 38 | CM584/09       | 0.61 | 34 | 24 | CH10/08         | 0.5 | 34 | 31 | D-13036            | 0.84 | 34 | 14 | CH61/09            | 0.65 |
| 35 | 20 | CH39/08         | 104 | 35 | 14 | CH61/09        | 0.59 | 35 | 33 | D-13012         | 0.3 | 35 | 14 | CH61/09            | 0.82 | 35 | 36 | D-13011            | 0.65 |
| 36 | 12 | K-01211         | 86  | 36 | 31 | D-13036        | 0.57 | 36 | 20 | CH39/08         | 0.3 | 36 | 5  | CM877/10           | 0.8  | 36 | 27 | CH15/11            | 0.65 |
| 37 | 33 | D-13012         | 86  | 37 | 30 | NIFA-1         | 0.49 | 37 | 12 | K-01211         | 0.3 | 37 | 30 | NIFA-1             | 0.79 | 37 | 22 | Pb2008             | 0.64 |
| 38 | 17 | DG-2017         | 58  | 38 | 3  | K-01242        | 0.45 | 38 | 17 | DG-2017         | 0.2 | 38 | 3  | K-01242            | 0.77 | 38 | 7  | TG12K02            | 0.53 |
| 39 | 38 | CM584/09        | 32  | 39 | 7  | TG12K02        | 0.44 | 39 | 38 | CM584/09        | 0.2 | 39 | 7  | TG12K02            | 0.64 | 39 | 5  | CM877/10           | 0.51 |
| 40 | 35 | BRC-457         | 31  | 40 | 6  | TG12K10        | 0.4  | 40 | 35 | BRC-457         | 0.2 | 40 | 6  | TG12K10            | 0.47 | 40 | 6  | TG12K10            | 0.32 |
